# Supplementary material
Source: PubMed Central journal article supplement (PMC3896976)

Figure 1. Comorbidity among generalized anxiety disorder (GAD), separation anxiety disorder (SAD), and social phobia (SOC). Note: Percentages add up to 100, n = 327.

Figure 2 shows comorbidity across all disorders. n = unweighted number in group; % = weighted percentage.

Figure 2. Comorbidity across all disorders in preschoolers with anxiety disorders. Note: Percentages add up to 100. ADHD = attention-deficit/hyperactivity disorder; DBD = disruptive behavior disorders (oppositional defiant disorder or conduct disorder); n = unweighted number in group; non-anxious disorders = depression (major depressive disorder, depression–not otherwise specified [NOS], or dysthymia); % = weighted percentage.

Figure S1. Sampling and recruitment design for the Duke Preschool Anxiety Study.

Note: GAD = generalized anxiety disorder; PAPA = Preschool Age Psychiatric Assessment; SAD = separation anxiety disorders; SOC = social phobia.

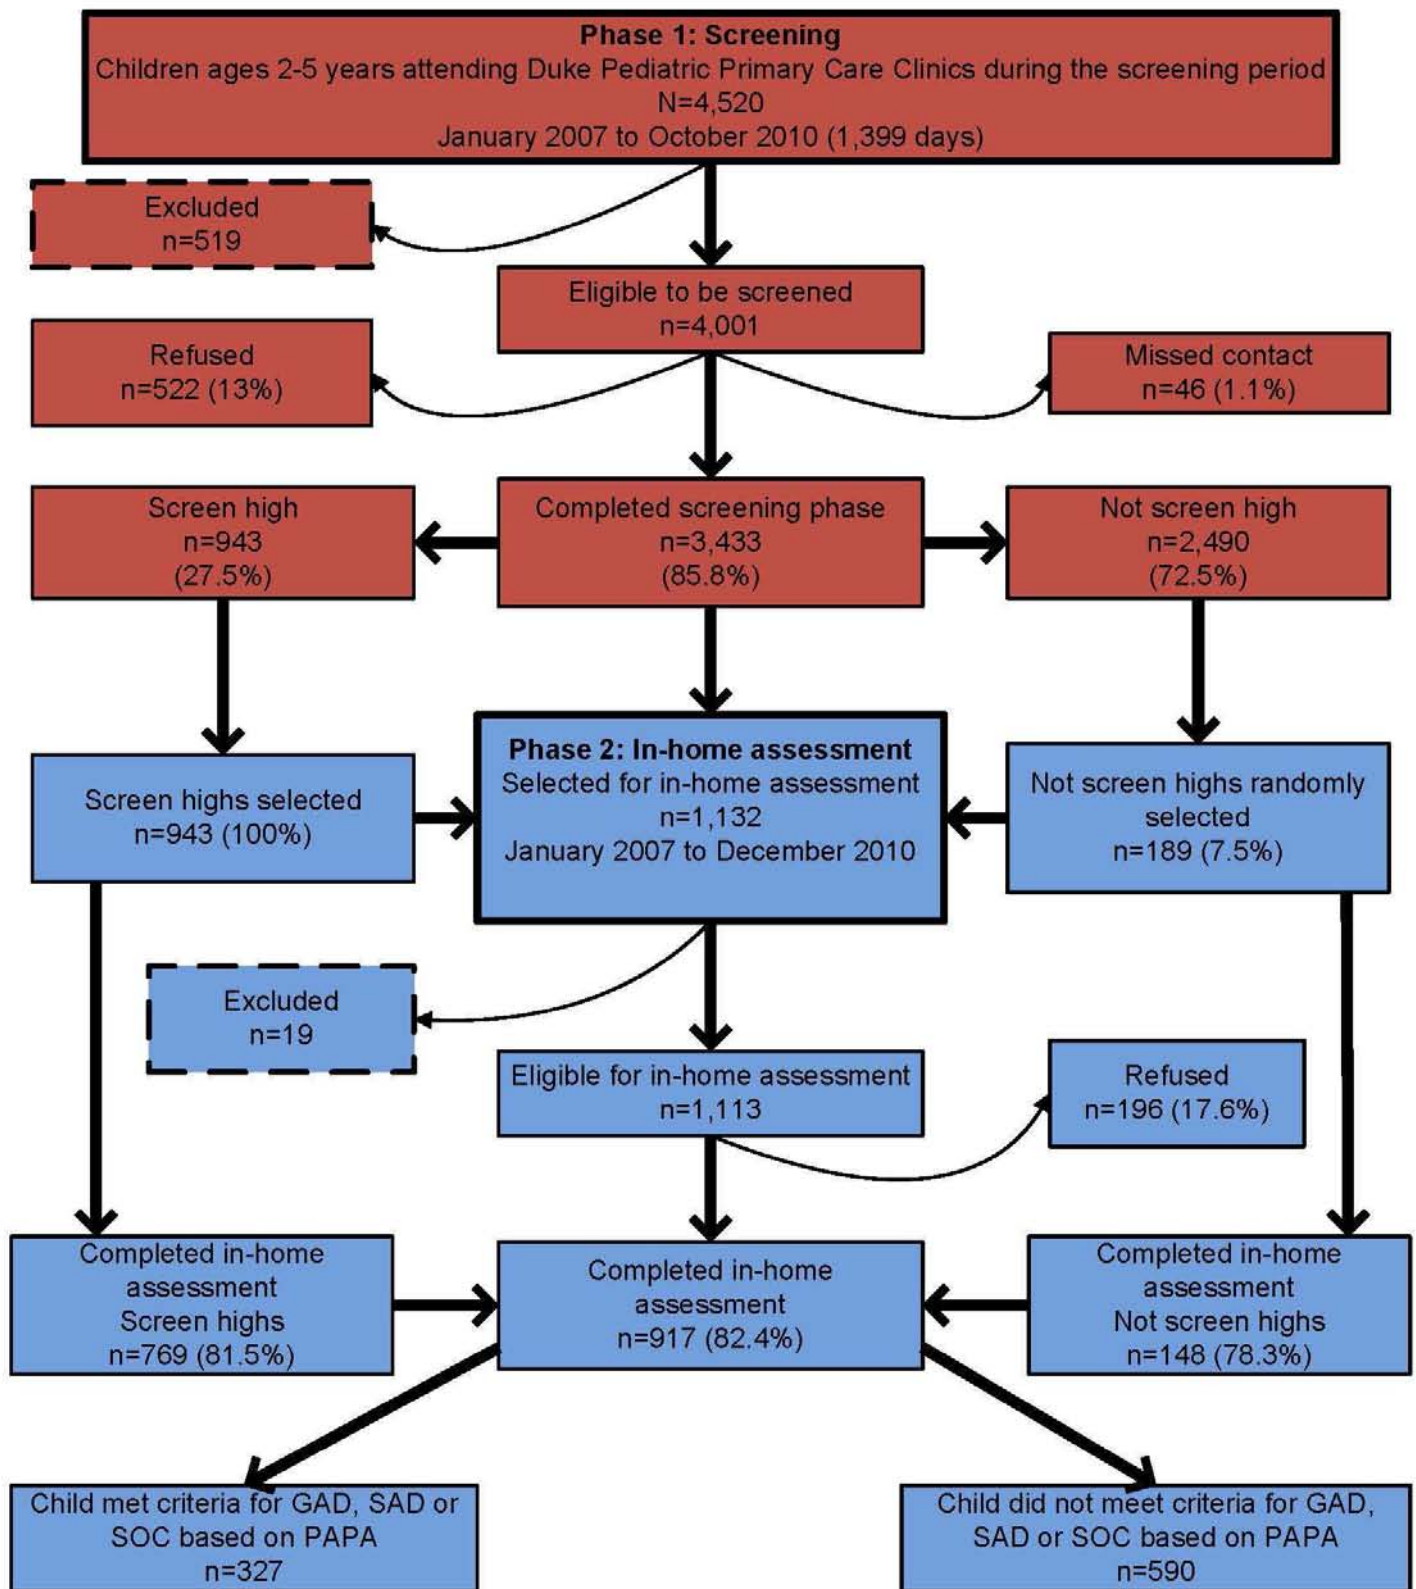

Supplement: NIHMS534151-supplement-supplement_1.pdf [file NIHMS534151-supplement-supplement_1.pdf]
